# Supplementary material
Source: PubMed Central journal article supplement (PMC2806571)
Supplement: supp_195_5_433__1.pdf [file supp_195_5_433__1.pdf]

## Data supplement

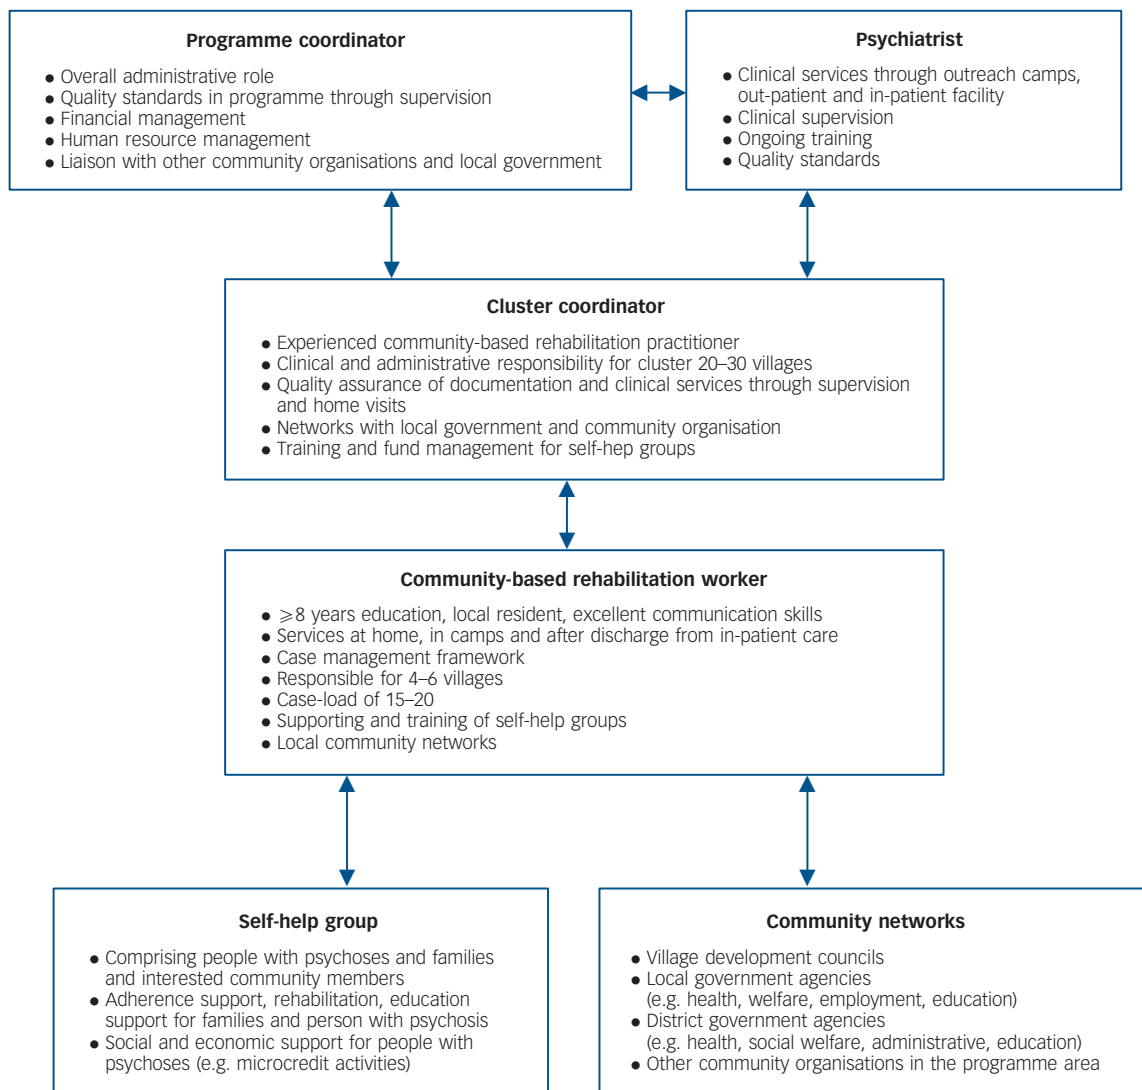

Fig DS1 The structure of the community-based rehabilitation programme

**Table DS1** Description of the interventions in the community-based rehabilitation programme

| Intervention component                   | Who delivered                                                                          | Frequency of contact                                                                                   | Setting of delivery                                                                                                                                   | Activity                                                                                                                                                                                                                                                                                                            |
|------------------------------------------|----------------------------------------------------------------------------------------|--------------------------------------------------------------------------------------------------------|-------------------------------------------------------------------------------------------------------------------------------------------------------|---------------------------------------------------------------------------------------------------------------------------------------------------------------------------------------------------------------------------------------------------------------------------------------------------------------------|
| First contact review                     | Community-based rehabilitation workers                                                 | At entry into the programme                                                                            | Home or outreach camp                                                                                                                                 | Baseline sociodemographic information about participant and family<br>Basic clinical data<br>Early date for medical review                                                                                                                                                                                          |
| Medical review                           | Psychiatrist                                                                           | At entry<br>Usually monthly reviews until stabilised<br>3-monthly reviews subsequently                 | Outreach camps<br>Out-patient and in-patient care at Ashagram Hospital                                                                                | Diagnostic review<br>Appropriate, phase-dependent pharmacological treatment<br>Education about medications and need for adherence and engagement with the community programme<br>In-patient care for acute crises and exacerbations of illness                                                                      |
| Need assessment and individual care plan | Community-based rehabilitation workers + cluster coordinator + psychiatrist            | At entry<br>Revised in team meetings every month                                                       | Consultation with service user and family at home                                                                                                     | Assessment of needs using locally developed interview<br>Updated at regular intervals during team meetings                                                                                                                                                                                                          |
| Psychoeducation                          | Community-based rehabilitation workers                                                 | 1–2 exploratory sessions<br>4–6 sessions subsequently within the initial, 'intensive engagement' phase | Home based                                                                                                                                            | Nature of illness and disabilities<br>Need for treatment<br>Need for family support<br>Provision of hope                                                                                                                                                                                                            |
| Adherence (medication) management        | Community-based rehabilitation workers + psychiatrist                                  | During every clinical contact                                                                          | Home based<br>Outreach camps                                                                                                                          | Explanation about time frame of action<br>Recognition and management of side-effects<br>Ensuring regular supplies of prescribed medications to participant<br>Need for use for an adequate duration and to discontinue only with medical advice                                                                     |
| Rehabilitation                           | Community-based rehabilitation workers + cluster coordinator + self-help group members | Once every month                                                                                       | Home based                                                                                                                                            | Improving activities of daily living and becoming independent<br>Resuming some work at home depending on gender<br>Resuming work as appropriate for increasing length of time<br>Improving social interactions within and outside family<br>Attending community activities and resuming roles expected as a citizen |
| Awareness programmes                     | Community-based rehabilitation workers + cluster coordinator                           | Once every month                                                                                       | Every village in the programme area<br>Community gatherings                                                                                           | Street plays, posters and interactive meetings where themes of early treatment, stigma, discrimination and inclusion were highlighted                                                                                                                                                                               |
| Networks to promote reintegration        | Community-based rehabilitation workers + cluster coordinator + self-help group members | Ongoing                                                                                                | Locally in every village<br>At the subdistrict government level<br>At the level of district administration<br>At the level of local health facilities | Access to local government schemes for disability benefits<br>Inclusion in local government developmental works<br>Inclusion in self-help groups<br>Access to general medical care                                                                                                                                  |
